# Supplementary material for: SARS-CoV-2 3CLpro Main Protease Drives Cytoskeletal Reorganization and Tunnelling Nanotube Formation for Stealth Intercellular Infection
Source: Research Square preprint supplement (doi:10.21203/rs.3.rs-3918469/v1), 2024-02-21
Supplement: Supplementary file 1 [file 465def4dee904e1d7c04ae64.xlsx]

## Sheet: Guide to Extended Data Tables
SARS-CoV-2 3CLpro Main Protease Drives Cytoskeletal Reorganization and Tunnelling Nanotube Formation for Stealth Intercellular Infection
Georgina S. Butler, Marli Vlok, Hugo Cesar Ramos de Jesus, Kaushal Baid, Yoan Machado, Isabel Pablos, Nestor Solis, Reinhild Kappelhoff, Peter A. Bell, Leo Nore, Peter M. Grin, Jenny P. Nguyen, Quynh T. Cao, Tess Lamar, Wayne Vuong, Sam J. Webster, John C Vederas, Jeremy A Hirota, Cecilia Lindskog, Arinjay Banerjee, Eric Jan, and Christopher M. Overall
Correspondence: chris.overall@ubc.ca
Extended Data Tables Overview
Extended Table 1	Proteins identified by Inactive Catalytic Domain Capture (ICDC) that interact with SARS-CoV-2 main protease, 3CLpro
Extended Table 2	Functional enrichment analysis of STRING interaction network of 3CLpro interactors
Extended Table 3	Proteins identified by Inactive Catalytic Domain Capture (ICDC) that interact with SARS-CoV-2 main protease, 3CLpro. Evidence suggesting that 3CLpro interacts with, and by extension could cleave, proteins to regulate cytoskeleton and the formation of cell projections.
Extended Table 4	Cleavage of peptides spanning potential 3CLpro cleavage sites in our multiplex mass spectrometry cleavage assay.

## Sheet: Ex. Data Table 1
Extended Data Table 1 | Proteins identified by Inactive Catalytic Domain Capture (ICDC) that interact with SARS-CoV-2 main protease, 3CLpro: List of 259 proteins that interact directly or indirectly with 3CLpro. Identified from 24 MS analyses of 12 3CLpro-C145A ICDC experiments using anti-FLAG-tag magnetic beads or anti-MYC-tag magnetic beads from 4 human cell lines. Proteins were included if the…
Protein Accession	Gene	Protein Description	Number of predicted cleavage sites	MW	Skyline analysis												MaxQuant analysis
					BEAS2B FLAG	BEAS2B IFN⍺ FLAG	BEAS2B IFNβ FLAG	BEAS2B MYC	BEAS2B IFN⍺ MYC	BEAS2B IFNβ MYC	IMR90 FLAG	IMR90 MYC	Caco-2 FLAG	Caco-2 MYC	Ea.hy926 FLAG	Ea.hy926 MYC	BEAS2B FLAG	BEAS2B IFN⍺ FLAG	BEAS2B IFNβ FLAG	BEAS2B MYC	BEAS2B IFN⍺ MYC	BEAS2B IFNβ MYC	IMR90 FLAG	IMR90 MYC	CaCo-2 FLAG	Caco-2 MYC	Ea.hy926 FLAG	Ea.hy926 MYC
A0A0B4J269	A0A0B4J269	G_PROTEIN_RECEP_F1_2 domain-containing protein	2	88.3818												
P60709	ACTB	Actin, cytoplasmic 1	0	41.74																		
Q8TC94	ACTL9	Actin-like protein 9	1	45.6273																			
O43707	ACTN4	Alpha-actinin-4	0	104.854												
P02768	ALB	Albumin	0	66.47																					
P25054	APC	Adenomatous polyposis coli protein	6	311.51											
Q8N6T3	ARFGAP1	ADP-ribosylation factor GTPase-activating protein 1	0	44.67												
Q5H9R4	ARMCX4	Armadillo repeat-containing X-linked protein 4	1	235.96		
P59998	ARPC4	Actin-related protein 2/3 complex subunit 4	1	19.54								
P17544	ATF7	Cyclic AMP-dependent transcription factor ATF-7	0	49.9509												
H7C0C1	ATP5PO	ATP synthase subunit O, mitochondrial	0	23.28								
P21283	ATP6V1C1	V-type proton ATPase subunit C 1	1	43.81										
B4DLN1	B4DLN1	cDNA FLJ60124, highly similar to Mitochondrial dicarboxylate carrier	0	48.0993									
Q8NDY6	BHLHE23	Class E basic helix-loop-helix protein 23	0	23.66															
P30043	BLVRB	Flavin reductase (NADPH)	2	21.99																					
Q5BKX5	C19orf54	Actin maturation protease (ACTMAP)	0	37.78											
P00915	CA1	Carbonic anhydrase 1	1	28.74																						
P00918	CA2	Carbonic anhydrase 2	0	29.11												
Q9NZT1	CALML5	Calmodulin-like protein 5	0	15.76																
O43852	CALU	Calumenin	0	34.96																		
A6NHC0	CAPN8	Calpain-8	0	79.14										
P52907	CAPZA1	F-actin-capping protein subunit alpha-1	0	32.79																		
P47756	CAPZB	F-actin-capping protein subunit beta	0	31.22																
Q96M63	CCDC114	Coiled-coil domain-containing protein 114	1	75.05												
Q9UFE4	CCDC39	Coiled-coil domain-containing protein 39	1	109.9						
O95067	CCNB2	G2/mitotic-specific cyclin-B2	1	45.28											
Q96S94	CCNL2	Cyclin-L2	0	58.02									
Q96JP9	CDHR1	Cadherin-related family member 1	1	91.43						
O94986	CEP152	Centrosomal protein of 152 kDa	2	195.626																			
O15078	CEP290	Centrosomal protein of 290 kDa	5	290.39																		
P23528	CFL1	Cofilin-1	1	18.37														
Q9UFW8	CGGBP1	CGG triplet repeat-binding protein 1	0	18.82																	
O14646	CHD1	Chromodomain-helicase-DNA-binding protein 1	2	196.69											
P30622	CLIP1	CAP-Gly domain-containing linker protein 1	2	162.25												
Q15417	CNN3	Calponin-3	0	36.41																		
P16220	CREB1	Cyclic AMP-responsive element-binding protein 1	0	35.14																				
P21291	CSRP1	Cysteine and glycine-rich protein 1	0	20.57																
Q14247	CTTN	Src substrate cortactin	0	61.59																	
Q93034	CUL5	Cullin-5	0	90.96												
P51398	DAP3	28S ribosomal protein S29, mitochondrial	1	43.1014																
Q96EP5	DAZAP1	DAZ-associated protein 1	0	43.38																		
Q16643	DBN1	Drebrin	1	71.3										
Q5VW00	DCAF12L2	DDB1- and CUL4-associated factor 12-like protein 2	1	50.8												
P81605	DCD	Dermcidin;Survival-promoting peptide;DCD-1	0	9.26															
P07585	DCN	Decorin	0	36.33												
Q92841	DDX17	Probable ATP-dependent RNA helicase DDX17	0	80.27																		
O00571	DDX3X	ATP-dependent RNA helicase DDX3X	0	73.11																		
P17844	DDX5	Probable ATP-dependent RNA helicase DDX5	0	69.15																		
Q7L2E3	DHX30	Putative ATP-dependent RNA helicase DHX30	3	133.94																		
Q8WXX0	DNAH7	Dynein heavy chain 7, axonemal	4	461.16									
Q96BY6	DOCK10	Dedicator of cytokinesis protein 10	3	249.53												
Q96EV8	DTNBP1	Dysbindin	0	39.49												
Q96AV8	E2F7	Transcription factor E2F7	2	99.89									
E9PLD3	E9PLD3	Ribonuclease P protein component	0	11.5999												
Q99848	EBNA1BP2	Probable rRNA-processing protein EBP2	0	34.8519								
O75530	EED	Polycomb protein EED	1	50.0665												
P50402	EMD	Emerin	0	28.99												
Q8N8S7	ENAH	Protein enabled homolog	1	66.5103																			
Q9HCS5	EPB41L4A	Band 4.1-like protein 4A	1	79.06								
Q01844	EWSR1	RNA-binding protein EWS	0	68.4782												
Q01469	FABP5	Fatty acid-binding protein, epidermal	0	15.0332													
Q8TCP9	FAM200A	Protein FAM200A	1	66.28							
P21802	FGFR2	Fibroblast growth factor receptor 2	2	89.75													
Q9P2Q2	FRMD4A	FERM domain-containing protein 4A	3	115.46												
Q8IY81	FTSJ3	pre-rRNA processing protein FTSJ3	0	96.56																		
Q99928	GABRG3	Gamma-aminobutyric acid receptor subunit gamma-3	2	52.47												
Q8IUC8	GALNT13	Polypeptide N-acetylgalactosaminyltransferase 13	0	64.05										
P04406	GAPDH	Glyceraldehyde-3-phosphate dehydrogenase	1	35.92																	
Q92616	GCN1	eIF-2-alpha kinase activator GCN1	8	292.63											
O43424	GRID2	Glutamate receptor ionotropic, delta-2	1	110.62						
Q12789	GTF3C1	General transcription factor 3C polypeptide 1	3	238.875																							
Q92522	H1FX	Histone H1.10	0	22.3559												
A0A0U1RRH7	H2AC4	Histone H2A type 1-B/E	0	18.5526							
P69905	HBA1	Hemoglobin subunit alpha	1	15.13																							
P68871	HBB	Hemoglobin subunit beta	0	15.87																						
P02042	HBD	Hemoglobin subunit delta	0	15.92																						
P69891	HBG1	Hemoglobin subunit gamma-1	0	16.01										
P69892	HBG2	Hemoglobin subunit gamma-2	0	15.9953																						
P02008	HBZ	Hemoglobin subunit zeta	1	15.51												
O60814	HIST1H2BK	Histone H2B type 1-K	0	13.759									
Q99880	HIST1H2BL	Histone H2B type 1-L	0	13.821																
P62805	HIST1H4A	Histone H4	0	11.2362																	
P82970	HMGN5	High mobility group nucleosome-binding domain-containing protein 5	0	31.52									
O14979	HNRNPDL	Heterogeneous nuclear ribonucleoprotein D-like	0	46.44																		
P52597	HNRNPF	Heterogeneous nuclear ribonucleoprotein F	0	45.67																		
P31943	HNRNPH1	Heterogeneous nuclear ribonucleoprotein H	0	49.23																	
P55795	HNRNPH2	Heterogeneous nuclear ribonucleoprotein H2	0	49.26										
P14866	HNRNPL	Heterogeneous nuclear ribonucleoprotein L	0	64.1328																				
Q1KMD3	HNRNPUL2	Heterogeneous nuclear ribonucleoprotein U-like protein 2	0	85.1																		
O43248	HOXC11	Homeobox protein Hox-C11	0	33.75														
Q9NQG7	HPS4	BLOC-3 complex member HPS4	1	76.92						
P11021	HSPA5	Endoplasmic reticulum chaperone BiP	0	70.48																	
P11142	HSPA8	Heat shock cognate 71 kDa protein	1	70.77																								
P38646	HSPA9	Stress-70 protein, mitochondrial	0	68.759										
Q12906	ILF3	Interleukin enhancer-binding factor 3	1	95.34																	
P35568	IRS1	Insulin receptor substrate 1	0	131.59												
P56199	ITGA1	Integrin alpha-1	0	127.837										
P05556	ITGB1	Integrin beta-1	0	86.19												
J3QQQ9	J3QQQ9	KOW domain-containing protein	0	12.6918										
P29375	KDM5A	Lysine-specific demethylase 5A	5	192.095																						
O15550	KDM6A	Lysine-specific demethylase 6A	5	154.28												
Q07666	KHDRBS1	KH domain-containing, RNA-binding, signal transduction-associated protein 1	0	48.23																							
O75525	KHDRBS3	KH domain-containing, RNA-binding, signal transduction-associated protein 3	0	38.8												
A0A0G2JN68	KIR2DL5B	Killer cell immunoglobulin-like receptor 2DL5B	1	38.42												
P04264	KRT1	Keratin, type II cytoskeletal 1	1	65.91																						
P13645	KRT10	Keratin, type I cytoskeletal 10	1	58.83																				
P02533	KRT14	Keratin, type I cytoskeletal 14	1	51.56																
P08779	KRT16	Keratin, type I cytoskeletal 16	2	51.27																
Q04695	KRT17	Keratin, type I cytoskeletal 17	1	48.11															
P35908	KRT2	Keratin, type II cytoskeletal 2 epidermal	2	65.43																							
P12035	KRT3	Keratin, type II cytoskeletal 3	2	64.42												
O76013	KRT36	Keratin, type I cuticular Ha6	1	52.25										
P19013	KRT4	Keratin, type II cytoskeletal 4	1	56.14																
P13647	KRT5	Keratin, type II cytoskeletal 5	0	62.38															
P02538	KRT6A	Keratin, type II cytoskeletal 6A	2	59.91																							
P04259	KRT6B	Keratin, type II cytoskeletal 6B	2	59.94															
P48668	KRT6C	Keratin, type II cytoskeletal 6C	2	59.89																l
O95678	KRT75	Keratin, type II cytoskeletal 75	0	59.56									
P05787	KRT8	Keratin, type II cytoskeletal 8	3	53.7																l	
Q6KB66	KRT80	Keratin, type II cytoskeletal 80	2	50.53												
P35527	KRT9	Keratin, type I cytoskeletal 9	1	62.06																l				
Q4G0J3	LARP7	La-related protein 7	0	66.9									
Q14847	LASP1	LIM and SH3 domain protein 1	1	29.72																l				
P09382	LGALS1	Galectin-1	0	14.58														
Q9UHB6	LIMA1	LIM domain and actin-binding protein 1	1	85.23																l
Q9H9Z2	LIN28A	Protein lin-28 homolog A	1	22.6117																								
P22079	LPO	Lactoperoxidase	1	71.57																l
Q93052	LPP	Lipoma-preferred partner	0	65.75												
Q9P244	LRFN1	Leucine-rich repeat and fibronectin type III domain-containing protein 1	0	79.23													l		
Q86UE6	LRRTM1	Leucine-rich repeat transmembrane neuronal protein 1	3	54.8318																				
Q9Y383	LUC7L2	Putative RNA-binding protein Luc7-like 2	1	46.51																l
Q9NR56	MBNL1	Muscleblind-like protein 1	1	41.8172																				
Q5VZF2	MBNL2	Muscleblind-like protein 2	1	40.52												
Q86XN8	MEX3D	RNA-binding protein MEX3D	0	64.88																		
P55081	MFAP1	Microfibrillar-associated protein 1	0	51.83										
Q13434	MKRN4P	Putative E3 ubiquitin-protein ligase makorin-4	2	52.91												
Q6WCQ1	MPRIP	Myosin phosphatase Rho-interacting protein	2	116.4																l
Q96GC5	MRPL48	39S ribosomal protein L48, mitochondrial	0	20.66											
O15457	MSH4	MutS protein homolog 4	1	104.76													l
P02795	MT2A	Metallothionein-2	0	6.04216																								
Q685J3	MUC17	Mucin-17	0	449.18												
P35580	MYH10	Myosin-10	10	229																l	
Q7Z406	MYH14	Myosin-14	6	227.739																	
P35579	MYH9	Myosin-9	12	226.4																l		
P05976	MYL1	Myosin light chain 1/3, skeletal muscle isoform	0	21.01										
O14950	MYL12B	Myosin regulatory light chain 12B	0	19.78												
P60660	MYL6	Myosin light polypeptide 6	0	16.93										
P14649	MYL6B	Myosin light chain 6B	1	22.76												
O43795	MYO1B	Unconventional myosin-Ib	1	131.99																l
Q9ULV0	MYO5B	Unconventional myosin-Vb	1	213.67												
O00483	NDUFA4	Cytochrome c oxidase subunit NDUFA4	0	9.36986																				
P20929	NEB	Nebulin	27	772.91						
P07196	NEFL	Neurofilament light polypeptide	3	61.52												
Q9UGY1	NOL12	Nucleolar protein 12	1	24.66												
Q9UMY1	NOL7	Nucleolar protein 7	0	29.43												
Q9Y3C1	NOP16	Nucleolar protein 16	0	21.19																		
P46459	NSF	Vesicle-fusing ATPase	1	82.5944										
Q14980	NUMA1	Nuclear mitotic apparatus protein 1	13	238.26											
Q9ULJ1	ODF2L	Outer dense fiber protein 2-like	2	73.73												
Q8WWZ8	OIT3	Oncoprotein-induced transcript 3 protein	1	57.72										
Q9H8K7	PAAT	ATPase PAAT (C10orf88)	2	49.25	
Q9UKK3	PARP4	Poly [ADP-ribose] polymerase 4	5	192.59						
Q15365	PCBP1	Poly(rC)-binding protein 1	0	37.5																l
Q9Y6V0	PCLO	Protein piccolo	9	560.7													l
Q13371	PDCL	Phosducin-like protein	0	34.15												
O60346	PHLPP1	PH domain leucine-rich repeat-containing protein phosphatase 1	5	184.67											
Q9P1W9	PIM2	Serine/threonine-protein kinase pim-2	1	34.19					
Q86WI1	PKHD1L1	Fibrocystin-L	10	463.61															
Q15149	PLEC	Plectin	14	531.79																l
O95602	POLR1A	DNA-directed RNA polymerase I subunit RPA1	4	194.81												
A5A3E0	POTEF	POTE ankyrin domain family member F	0	121.44											
Q03181	PPARD	Peroxisome proliferator-activated receptor delta	1	49.9									
P62937	PPIA	Peptidyl-prolyl cis-trans isomerase A	0	18.01													l
P23284	PPIB	Peptidyl-prolyl cis-trans isomerase B	0	20.29									
Q13356	PPIL2	Peptidyl-prolyl cis-trans isomerase-like 2	0	58.82															
P36873	PPP1CC	Serine/threonine-protein phosphatase PP1-gamma catalytic subunit	0	36.85												
P32119	PRDX2	Peroxiredoxin-2	0	21.76																					
Q92954	PRG4	Proteoglycan 4	0	148.316																				
P06454	PTMA	Prothymosin alpha	0	12.2															
Q9H3S7	PTPN23	Tyrosine-protein phosphatase non-receptor type 23	3	178.974									
P23469	PTPRE	Receptor-type tyrosine-protein phosphatase epsilon	0	78.62																l
P98175	RBM10	RNA-binding protein 10	4	103.53																l
Q96PK6	RBM14	RNA-binding protein 14	1	69.49																		
P78332	RBM6	RNA-binding protein 6	1	128.64								
Q15293	RCN1	Reticulocalbin-1	0	35.87																l	
P62906	RPL10A	60S ribosomal protein L10a	1	24.7										
P62913	RPL11	60S ribosomal protein L11	0	20.12																l
P26373	RPL13	60S ribosomal protein L13	1	24.26																l	
P18621	RPL17-C18orf32;RPL17	60S ribosomal protein L17	0	26.37																				
P84098	RPL19	60S ribosomal protein L19	1	23.47																	
P46778	RPL21	60S ribosomal protein L21	0	18.43																		
P62829	RPL23	60S ribosomal protein L23	0	14.87																		
P62750	RPL23A	60S ribosomal protein L23a	0	17.5639										
P83731	RPL24	60S ribosomal protein L24	0	17.78																		
P46776	RPL27A	60S ribosomal protein L27a	0	16.56																l				
P47914	RPL29	60S ribosomal protein L29	0	17.62																		
P62910	RPL32	60S ribosomal protein L32	0	15.73																l				
P42766	RPL35	60S ribosomal protein L35	0	14.42												
Q9Y3U8	RPL36	60S ribosomal protein L36	0	12.12												
P83881	RPL36A	60S ribosomal protein L36a	0	12.44										
P61513	RPL37A	60S ribosomal protein L37a	0	10.2752																				
P62891	RPL39	60S ribosomal protein L39	0	6.41																	
Q02878	RPL6	60S ribosomal protein L6	1	32.6																	
P62917	RPL8	60S ribosomal protein L8	0	27.89								
P05387	RPLP2	60S acidic ribosomal protein P2	0	11.66													l
H3BN98	RPS15A	40S ribosomal protein S15a	0	14.71																	
P62249	RPS16	40S ribosomal protein S16	1	16.31																				
H3BNC9	RPS17	40S ribosomal protein S17	0	15.42				
P62847	RPS24	40S ribosomal protein S24	0	15.42																l
P62851	RPS25	40S ribosomal protein S25	0	13.74																		
P62979	RPS27A	Ubiquitin-40S ribosomal protein S27a	0	8.56																		
P23396	RPS3	40S ribosomal protein S3	0	26.56												
P61247	RPS3A	40S ribosomal protein S3a	1	29.81																		
P46782	RPS5	40S ribosomal protein S5	0	22.88																		
P62753	RPS6	40S ribosomal protein S6	0	28.68																		
P62081	RPS7	40S ribosomal protein S7	0	22.13												
Q15404	RSU1	Ras suppressor protein 1	0	31.41																l				
Q9BY12	SCAPER	S phase cyclin A-associated protein in the endoplasmic reticulum	4	158.29												
Q9BRK5	SDF4	45 kDa calcium-binding protein	0	37.925										
Q12872	SFSWAP	Splicing factor, suppressor of white-apricot homolog	1	104.82										
Q9BZQ2	SHCBP1L	Testicular spindle-associated protein SHCBP1L	0	72.63												
Q9P2F8	SIPA1L2	Signal-induced proliferation-associated 1-like protein 2	2	190.44		
Q9UHW9	SLC12A6	Solute carrier family 12 member 6	3	127.62										
Q9NY99	SNTG2	Gamma-2-syntrophin	2	60.22																		
Q16629	SRSF7	Serine/arginine-rich splicing factor 7	0	27.37																l
Q92783	STAM	Signal transducing adapter molecule 1	2	59.05																l	
O60506	SYNCRIP	Heterogeneous nuclear ribonucleoprotein Q	1	69.4714										
Q8NF91	SYNE1	Nesprin-1	38	1011.09												
Q9P1P5	TAAR2	Trace amine-associated receptor 2	0	40.13												
Q92804	TAF15	TATA-binding protein-associated factor 2N	0	61.83																l
A7MCY6	TBKBP1	TANK-binding kinase 1-binding protein 1	3	67.7															
Q99973	TEP1	Telomerase protein component 1	6	290.49												
Q15569	TESK1	Dual specificity testis-specific protein kinase 1	2	67.68													l		
Q01085	TIAL1	Nucleolysin TIAR	0	41.59																		
Q9H1K6	TLNRD1	Talin rod domain-containing protein 1	0	37.63												
Q9NYL9	TMOD3	Tropomodulin-3	0	39.59																l
P60174	TPI1	Triosephosphate isomerase	0	26.5383								
P09493	TPM1	Tropomyosin alpha-1 chain	0	32.71																l
P06753	TPM3	Tropomyosin alpha-3 chain	0	32.82												
Q14258	TRIM25	E3 ubiquitin/ISG15 ligase TRIM25	1	70.97																l	
Q13263	TRIM28	Transcription intermediary factor 1-beta	1	88.42																l				
Q9UHF7	TRPS1	Zinc finger transcription factor Trps1	4	141.52												
O43156	TTI1	TELO2-interacting protein 1 homolog	7	122.07														
P68363	TUBA1B	Tubulin alpha-1B chain	1	50.15																	
P68371	TUBB4B	Tubulin beta-4B chain	2	49.83																l
P10599	TXN	Thioredoxin	0	11.61	
Q9H3M7	TXNIP	Thioredoxin-interacting protein	0	43.66									
Q9NNW7	TXNRD2	Thioredoxin reductase 2, mitochondrial	0	52.98												
P62987	UBA52	Ubiquitin-60S ribosomal protein L40	0	14.73														
P0CG47	UBB	Polyubiquitin-B	0	8.56												
P35125	USP6	Ubiquitin carboxyl-terminal hydrolase 6	1	158.66												
P46939	UTRN	Utrophin	4	394.47												
P08670	VIM	Vimentin	2	53.52																		
Q5VTH9	WDR78	WD repeat-containing protein 78	0	94.57																		
P49750	YLPM1	YLP motif-containing protein 1	4	241.65																l
P15622	ZNF250	Zinc finger protein 250	0	63.4679																			
Q9Y3M9	ZNF337	Zinc finger protein 337	1	86.87										
O95229	ZWINT	ZW10 interactor	2	31.29							
Q15942	ZYX	Zyxin	1	61.15																l

## Sheet: Ex. Data Table 2
Extended Data Table 2 | Functional enrichment analysis of the STRING interaction network of 256/259 3CLpro interactors shown in Fig 1d. Clusters coloured orange show enrichment in actin cytoskeleton and cytoskeletal rearrangement, those outlined in magenta are enriched in plasma membrane bounded cell projections, and those coloured blue are enriched for RNA binding. KOW domain-containing protein …
Number of background genes	Number of genes	Category	Gene Ontology (GO) term	Description	FDR	Genes	p-value	network.SUID	nodes.SUID	PMID		Transferred FDR value
4880	156	GO Cellular Component	GO:0043232	Intracellular non-membrane-bounded organelle	3.49e-30	KRT14|MYH9|HNRNPL|RPL19|DDX5|GAPDH|HIST1H4F|KRT9|RPS16|HBA2|KRT5|KRT1|KRT75|KRT6C|KRT6B|ACTN4|TRIM28|APC|RPL35|EPB41L4A|RPL8|TEP1|CAPZA1|MSH4|EED|POLR1A|PTPN23|MFAP1|MESDC1|KRT10|RPS27A|RPS3|MBNL1|MYO5B|CCNB2|DBN1|HSPA9|GCN1L1|KRT16|HIST1H2AE|PCBP1|MYL1|RPL13|KRT17|MRPL48|TMOD3|KRT2|PPARD|DNAH7|RBM14|SNTG2|ACTL9|CCDC114|RPLP2|E2F7|PLEC|TRIM25|ZYX|LASP1|KRT36|H1FX|PCLO|TUBA1B|RPS7|TUBB4B|DTNBP1|PP…	1.42e-33	232344	180898|181015|181126|180901|180910|181000|181219|181459|181387|181633|181087|181093|181096|181114|181123|181510|181144|181372|181240|181363|181396|181057|181252|181162|181549|181327|181090|181660|180949|181507|181312|181171|181261|181048|180946|181288|181006|180988|181027|180934|180928|180997|181534|181198|181054|181618|181339|181600|181492|181285|181354|181066|181504|181216|181423|181168|181120|…			2.94572
1649	92	GO Molecular Function	GO:0003723	RNA binding	5.22e-30	DCN|LGALS1|MYH9|HNRNPL|RPL19|DDX5|DAZAP1|HIST1H4F|RPS16|ACTN4|TRIM28|RPL35|RPL8|TEP1|RBM6|MBNL2|MFAP1|RPS27A|RPS3|MBNL1|HSPA9|PPIB|GCN1L1|HNRNPUL2|PCBP1|RPL13|RBM14|KHDRBS1|PLEC|TRIM25|ZYX|YLPM1|SRSF7|RBM10|H1FX|TUBA1B|RPS7|TUBB4B|PPP1CC|RPL27A|RPL21|RPS3A|CGI-74|KHDRBS3|HNRNPH1|HMGN5|NOL12|MYH10|RPL39|SYNE1|CSRP1|DAP3|TIAL1|SYNCRIP|HNRNPH2|RPL10A|LIN28A|TXN|RPL11|RPS6|RPL24|DDX17|DDX3X|MEX3D|RPL…	1e-33	232344	181375|181378|181015|181126|180901|180910|181111|181219|181387|181510|181144|181240|181396|181057|181351|181531|181660|181312|181171|181261|181006|181486|180988|181543|180928|181534|181285|181195|181168|181120|181642|181468|181318|181258|181588|181411|181156|181150|181636|181393|181360|181183|181306|181204|181546|181474|181336|181348|181222|180895|181453|181627|180907|180961|181630|181243|180931|…			2.92823
635	61	GO Molecular Function	GO:0005198	Structural molecule activity	5.22e-30	DCN|KRT14|RPL19|KRT9|RPS16|KRT5|KRT1|KRT75|KRT6B|RPL35|RPL8|KRT10|RPS27A|RPS3|KRT16|MUC17|MYL1|RPL13|KRT17|KRT2|SNTG2|RPLP2|PLEC|KRT36|PCLO|TUBA1B|RPS7|TUBB4B|RPL27A|RPL21|RPS3A|ACTB|TPM1|RPL39|CSRP1|DAP3|RPL10A|RPL11|KRT6A|RPS6|NUMA1|RPL24|ARPC4|RPL23A|RPL17|RPL6|RPL36A|RPS24|RPL32|RPL37A|RPL29|RPL23|RPS25|VIM|MYL6|MYL6B|ENSP00000451560|RPL36|RPS5|NEFL|NEB	1.66e-33	232344	181375|180898|180901|181459|181387|181087|181093|181096|181123|181240|181396|181507|181312|181171|181027|180940|180997|181534|181198|181339|181354|181216|181168|181132|180919|181411|181156|181150|181393|181360|181183|181537|181447|181222|181453|181627|181243|180937|181036|181597|180970|181141|180973|181567|180991|181585|181609|181279|181444|181651|181384|180913|181333|181234|181084|181426|181603|…			2.92823
97	30	GO Cellular Component	GO:0022626	Cytosolic ribosome	9.24e-27	RPL19|RPS16|HBA2|RPL35|RPL8|RPS27A|RPS3|RPL13|RPLP2|RPS7|RPL27A|RPL21|RPS3A|RPL39|RPL10A|RPL11|RPS6|RPL24|RPL23A|RPL17|RPL6|RPL36A|RPS24|RPL32|RPL37A|RPL29|RPL23|RPS25|RPL36|RPS5	1.5e-29	232344	180901|181387|181633|181240|181396|181312|181171|181534|181216|181156|181393|181360|181183|181222|181243|180937|181597|181141|181567|180991|181585|181609|181279|181444|181651|181384|180913|181333|181174|181300			2.60343
2099	89	GO Cellular Component	GO:0070062	Extracellular exosome	1.52e-21	KRT14|LGALS1|MYH9|HNRNPL|DDX5|GAPDH|TPI1|HIST1H4F|KRT9|RPS16|HBA2|KRT5|KRT1|KRT75|KRT6C|KRT6B|ACTN4|HBZ|DOCK10|LPO|CAPZA1|BLVRB|PTPN23|KRT10|RPS27A|RPS3|ITGA1|MYO5B|CA2|ALB|HSPA9|FABP5|PPIB|PRDX2|KRT16|HIST1H2AE|UBB|PCBP1|KRT2|RPLP2|PLEC|HSPA5|SRSF7|KRT36|HBB|PCLO|TUBB4B|RPS3A|ACTB|POTEF|SDF4|MYH10|CSRP1|UTRN|TPM3|RPL10A|TXN|RPL11|HIST1H2BL|RSU1|KRT6A|PARP4|MYO1B|NUMA1|RPL24|ATP6V1C1|ITGB1|DDX3X|…	3.72e-24	232344	180898|181378|181015|181126|180910|181000|181207|181219|181459|181387|181633|181087|181093|181096|181114|181123|181510|181246|181330|181099|181252|181042|181090|181507|181312|181171|180952|181048|181519|181294|181006|181186|181486|181051|181027|180934|180982|180928|181339|181216|181168|181018|181318|181132|181282|180919|181150|181183|181537|181456|181594|181348|181453|181273|181129|181243|181540|…			2.08182
405	36	GO Cellular Component	GO:0005925	Focal adhesion	1.7e-16	MYH9|RPL19|RPS16|ACTN4|RPL8|RPS3|ITGA1|HSPA9|PPIB|RPLP2|PLEC|HSPA5|ZYX|LASP1|RPS7|PPP1CC|RPS3A|ACTB|ENAH|CSRP1|CNN3|RPL10A|CTTN|RSU1|LIMA1|MPRIP|ITGB1|RPL6|RPL37A|PPIA|RPL23|HSPA8|CFL1|VIM|RPS5|LPP	8.99e-19	232344	181015|180901|181387|181510|181396|181171|180952|181006|181486|181216|181168|181018|181642|181135|181156|181636|181183|181537|180943|181453|181381|181243|180976|181117|181291|181177|180967|181585|181651|181021|180913|181231|180925|181234|181300|180955			1.57696
1126	57	GO Biological Process	GO:0007010	Cytoskeleton organization	2.57e-15	KRT14|MYH9|GAPDH|KRT9|KRT5|KRT6C|KRT6B|ACTN4|EPB41L4A|CAPZA1|RPS3|MYO5B|DBN1|KRT16|KRT17|TMOD3|KRT2|DNAH7|RBM14|CCDC114|PLEC|ZYX|PCLO|TUBA1B|TUBB4B|DTNBP1|ACTB|TPM1|MYH10|ENAH|SYNE1|CSRP1|TPM3|CNN3|CTTN|KRT6A|CALML5|CEP152|MYO1B|NUMA1|LIMA1|MPRIP|ITGB1|ARPC4|CAPZB|CCDC39|KRT3|CFL1|VIM|KRT4|KRT8|ENSP00000451560|MYH14|CLIP1|TESK1|NEFL|NEB	2.5e-18	232344	180898|181015|181000|181459|181087|181114|181123|181510|181363|181252|181171|181048|181288|181027|181198|181618|181339|181492|181285|181504|181168|181642|180919|181411|181150|181564|181537|181447|181348|180943|180895|181453|181129|181381|180976|181036|181105|181210|181414|180970|181291|181177|180967|180973|181321|180979|181297|180925|181234|181108|181264|181603|181513|181555|181612|181582|181576			1.45901
1261	59	GO Cellular Component	GO:0099080	Supramolecular complex	3.12e-15	DCN|KRT14|MYH9|HNRNPL|KRT9|KRT5|KRT1|KRT75|KRT6C|KRT6B|ACTN4|APC|MFAP1|KRT10|MBNL1|KRT16|PCBP1|MYL1|KRT17|TMOD3|KRT2|DNAH7|PLEC|TRIM25|KRT36|TUBA1B|TUBB4B|PPP1CC|ACTB|TPM1|MYH10|SYNE1|CSRP1|TPM3|TIAL1|EMD|ZWINT|LIN28A|KRT6A|RPS6|PARP4|MYO1B|NUMA1|KRT80|DDX3X|CAPZB|RPL6|DHX30|KRT3|VIM|KRT4|KRT8|MYL6B|ENSP00000451560|MYL12B|MYH14|CLIP1|NEFL|NEB	1.9e-17	232344	181375|180898|181015|181126|181459|181087|181093|181096|181114|181123|181510|181372|181660|181507|181261|181027|180928|180997|181198|181618|181339|181492|181168|181120|181132|181411|181150|181636|181537|181447|181348|180895|181453|181129|180907|181072|181399|180931|181036|181597|181165|181414|180970|181153|181621|181321|181585|181255|181297|181234|181108|181264|181426|181603|181465|181513|181555|…			1.45058
1899	69	GO Biological Process	GO:0044419	Interspecies interaction between organisms	4.12e-12	DCN|RPL19|GAPDH|MT2A|RPS16|KRT1|TRIM28|RPL35|LPO|RPL8|CAPZA1|EED|RPS27A|RPS3|PPIB|PRDX2|KRT16|UBB|PCBP1|RPL13|PPARD|RBM14|RPLP2|TRIM25|ZYX|RPS7|TUBB4B|RPL27A|RPL21|RPS3A|KHDRBS3|HIST1H2BK|TBKBP1|RPL39|SYNCRIP|RPL10A|RPL11|PIM2|KRT6A|RPS6|KIR3DL1|CUL5|RPL24|ITGB1|DDX17|DDX3X|CREB1|RPL23A|RPL17|ATF7|RPL6|ILF3|RPL36A|DCD|FGFR2|RPS24|RPL32|RPL37A|RPL29|PPIA|RPL23|HSPA8|CFL1|RPS25|VIM|KRT8|RPL36|RPS5|…	5.64e-15	232344	181375|180901|181000|181012|181387|181093|181144|181240|181099|181396|181252|181549|181312|181171|181486|181051|181027|180982|180928|181534|181600|181285|181216|181120|181642|181156|181150|181393|181360|181183|181204|181237|181438|181222|180961|181243|180937|181315|181036|181597|181489|181435|181141|180967|181228|181621|181303|181567|180991|181390|181585|181657|181609|181366|181009|181279|181444|…			1.13851
68	15	GO Cellular Component	GO:0005844	Polysome	1.68e-11	RPL19|RPL8|RPS3|GCN1L1|MYH10|RPL39|RPL10A|LIN28A|RPL11|RPL24|RPL6|RPL36A|RPL32|VIM|RPL36	1.71e-13	232344	180901|181396|181171|180988|181348|181222|181243|180931|180937|181141|181585|181609|181444|181234|181174			1.07747
477	30	GO Cellular Component	GO:0015629	Actin cytoskeleton	3.36e-10	MYH9|ACTN4|CAPZA1|MESDC1|MYO5B|DBN1|MYL1|TMOD3|ACTL9|ZYX|LASP1|ACTB|TPM1|MYH10|UTRN|TPM3|CNN3|CTTN|MYO1B|LIMA1|MPRIP|ARPC4|CAPZB|CFL1|MYL6|MYL6B|MYL12B|MYH14|LPP|NEB	3.97e-12	232344	181015|181510|181252|180949|181048|181288|180997|181618|181066|181642|181135|181537|181447|181348|181273|181129|181381|180976|181414|181291|181177|180973|181321|180925|181084|181426|181465|181513|180955|181576			0.947366
113	17	GO Biological Process	GO:0070268	Cornification	5.2e-10	KRT14|KRT9|KRT5|KRT1|KRT75|KRT6C|KRT6B|KRT10|KRT16|KRT17|KRT2|KRT36|KRT6A|KRT80|KRT3|KRT4|KRT8	1.01e-12	232344	180898|181459|181087|181093|181096|181114|181123|181507|181027|181198|181339|181132|181036|181153|181297|181108|181264			0.9284
334	26	GO Molecular Function	GO:0045296	Cadherin binding	1.03e-09	MYH9|CAPZA1|CCNB2|DBN1|GCN1L1|PCBP1|TMOD3|PLEC|TRIM25|HSPA5|LASP1|H1FX|EMD|CNN3|CTTN|MYO1B|RPL24|LIMA1|MPRIP|ITGB1|DDX3X|RPL23A|CAPZB|RPL6|RPL29|HSPA8	1.38e-12	232344	181015|181252|180946|181288|180988|180928|181618|181168|181120|181018|181135|181588|181072|181381|180976|181414|181141|181291|181177|180967|181621|181567|181321|181585|181384|181231			0.898716
104	16	GO Molecular Function	GO:0005200	Structural constituent of cytoskeleton	2.3e-09	KRT14|KRT9|KRT5|KRT6B|KRT16|KRT2|PLEC|TUBA1B|TUBB4B|ACTB|TPM1|KRT6A|ARPC4|VIM|ENSP00000451560|NEFL	3.52e-12	232344	180898|181459|181087|181123|181027|181339|181168|181411|181150|181537|181447|181036|180973|181234|181603|181582			0.863827
7390	147	GO Cellular Component	GO:0005634	Nucleus	1.48e-08	KRT14|LGALS1|MYH9|HNRNPL|RPL19|DDX5|GAPDH|TPI1|DAZAP1|HIST1H4F|MT2A|KRT9|RPS16|KRT5|KRT1|ACTN4|TRIM28|PTPRE|APC|DOCK10|RPL35|TEP1|PHLPP1|MSH4|EED|BLVRB|POLR1A|PTPN23|RBM6|MBNL2|MFAP1|KRT10|RPS27A|RPS3|MBNL1|CCNB2|ZNF250|ALB|HSPA9|FABP5|PPIB|KRT16|HNRNPUL2|HIST1H2AE|UBB|IRS1|PCBP1|RPL13|KRT2|PPARD|RBM14|KHDRBS1|E2F7|TRIM25|HSPA5|ZYX|YLPM1|SRSF7|RBM10|H1FX|OIT3|PPIL2|RPS7|TUBB4B|DTNBP1|PPP1CC|PTMA|…	1.98e-10	232344	180898|181378|181015|181126|180901|180910|181000|181207|181111|181219|181012|181459|181387|181087|181093|181510|181144|181102|181372|181330|181240|181057|181024|181162|181549|181042|181327|181090|181351|181531|181660|181507|181312|181171|181261|180946|181417|181294|181006|181186|181486|181027|181543|180934|180982|181189|180928|181534|181339|181600|181285|181195|181423|181120|181018|181642|181468|…			0.782974
39	10	GO Cellular Component	GO:0022627	Cytosolic small ribosomal subunit	4.13e-08	RPS16|HBA2|RPS27A|RPS3|RPS7|RPS3A|RPS6|RPS24|RPS25|RPS5	5.72e-10	232344	181387|181633|181312|181171|181156|181183|181597|181279|181333|181300			0.738405
75	12	GO Cellular Component	GO:0042641	Actomyosin	8.79e-08	MYH9|ACTN4|MESDC1|DBN1|ZYX|TPM1|MYH10|TPM3|LIMA1|MYL12B|MYH14|LPP	1.25e-09	232344	181015|181510|180949|181288|181642|181447|181348|181129|181291|181465|181513|180955			0.705601
480	27	GO Biological Process	GO:0097435	Supramolecular fiber organization	2.22e-07	KRT14|KRT9|ACTN4|MYO5B|DBN1|KRT17|TMOD3|KRT2|ZYX|TPM1|MYH10|ENAH|CSRP1|TPM3|CTTN|MYO1B|NUMA1|LIMA1|MPRIP|ITGB1|ARPC4|CFL1|VIM|KRT8|CLIP1|NEFL|NEB	5.31e-10	232344	180898|181459|181510|181048|181288|181198|181618|181339|181642|181447|181348|180943|181453|181129|180976|181414|180970|181291|181177|180967|180973|180925|181234|181264|181555|181582|181576			0.665365
152	16	GO Biological Process	GO:0043484	Regulation of rna splicing	2.39e-07	HNRNPL|DDX5|DAZAP1|MBNL2|MBNL1|KHDRBS1|SRSF7|RBM10|KHDRBS3|HNRNPH1|HNRNPH2|DDX17|HNRNPF|LARP7|HSPA8|SFSWAP	6.01e-10	232344	181126|180910|181111|181531|181261|181195|181318|181258|181204|181546|181630|181228|181369|180964|181231|181483			0.66216
289	21	GO Molecular Function	GO:0003729	mRNA binding	2.82e-07	HNRNPL|DDX5|DAZAP1|RPL35|RPS3|PCBP1|RBM14|KHDRBS1|RPS7|RPS3A|CGI-74|KHDRBS3|MYH10|TIAL1|SYNCRIP|LIN28A|DDX3X|MEX3D|ILF3|RPS5|TAF15	7.02e-10	232344	181126|180910|181111|181240|181171|180928|181285|181195|181156|181183|181306|181204|181348|180907|180961|180931|181621|181030|181657|181300|181654			0.654975
2375	67	GO Biological Process	GO:0051649	Establishment of localization in cell	3.95e-07	MYH9|RPL19|RPS16|KRT1|ACTN4|RPL35|RPL8|CAPZA1|PTPN23|RPS27A|RPS3|MYO5B|ALB|HSPA9|FABP5|UBB|RPL13|ARFGAP1|RPLP2|HSPA5|SRSF7|HBB|PCLO|TUBA1B|RPS7|TUBB4B|DTNBP1|RPL27A|RPL21|RPS3A|ACTB|MYH10|RPL39|RPL10A|ZWINT|RPL11|CTTN|STAM|CALML5|RPS6|MYO1B|NUMA1|RPL24|ITGB1|HPS4|NSF|DDX3X|RPL23A|RPL17|CAPZB|RPL6|RPL36A|RPS24|RPL32|RPL37A|RPL29|PPIA|RPL23|HSPA8|RPS25|CEP290|USP6|TXNIP|RPL36|RPS5|CLIP1|NEFL	1.06e-09	232344	181015|180901|181387|181093|181510|181240|181396|181252|181090|181312|181171|181048|181294|181006|181186|180982|181534|181639|181216|181018|181318|181282|180919|181411|181156|181150|181564|181393|181360|181183|181537|181348|181222|181243|181399|180937|180976|181147|181105|181597|181414|180970|181141|180967|181180|181441|181621|181567|180991|181321|181585|181609|181279|181444|181651|181384|181021|…			0.64034
1216	44	GO Molecular Function	GO:0044877	Protein-containing complex binding	4.94e-07	DCN|KRT14|MYH9|DDX5|ACTN4|APC|PDCL|CAPZA1|RPS3|ITGA1|MYO5B|DBN1|GCN1L1|IRS1|KHDRBS1|HSPA5|LASP1|H1FX|NDUFA4|PPP1CC|HMGN5|TPM1|MYH10|SYNE1|UTRN|TPM3|LIN28A|CTTN|MYO1B|NUMA1|LIMA1|MPRIP|ITGB1|NSF|DDX3X|RPL23A|CAPZB|HSPA8|CFL1|VIM|KRT8|MYH14|NEFL|NEB	1.42e-09	232344	181375|180898|181015|180910|181510|181372|180994|181252|181171|180952|181048|181288|180988|181189|181195|181018|181135|181588|181405|181636|181474|181447|181348|180895|181273|181129|180931|180976|181414|180970|181291|181177|180967|181441|181621|181567|181321|181231|180925|181234|181264|181513|181582|181576			0.630627
49	10	GO Biological Process	GO:0045104	Intermediate filament cytoskeleton organization	1.31e-06	KRT14|KRT9|KRT6C|KRT16|KRT17|KRT2|PLEC|KRT3|VIM|NEFL	3.9e-09	232344	180898|181459|181114|181027|181198|181339|181168|181297|181234|181582			0.588273
11	6	GO Cellular Component	GO:0031838	Haptoglobin-hemoglobin complex	2.46e-06	HBA2|HBZ|HBG1|HBB|HBG2|HBD	4.81e-08	232344	181633|181246|181201|181282|181462|181645			0.560906
643	28	GO Cellular Component	GO:0098794	Postsynapse	2.59e-06	LRFN1|DOCK10|RPL8|RPS3|GRID2|DBN1|LRRTM1|FABP5|ARFGAP1|PCLO|DTNBP1|PPP1CC|ACTB|MYH10|SYNE1|UTRN|CNN3|HNRNPH2|RPL10A|CTTN|ITGB1|NSF|RPL6|RPL23|HSPA8|RPS25|GABRG3|NEFL	5.16e-08	232344	180958|181330|181396|181171|181159|181288|181450|181186|181639|180919|181564|181636|181537|181348|180895|181273|181381|181630|181243|180976|180967|181441|181585|180913|181231|181333|181357|181582			0.55867
121	13	GO Biological Process	GO:0030048	Actin filament-based movement	5.55e-06	MYH9|ACTN4|MYO5B|MYL1|TPM1|MYH10|TPM3|MYO1B|VIM|MYL6|MYL6B|MYH14|NEB	2.03e-08	232344	181015|181510|181048|180997|181447|181348|181129|181414|181234|181084|181426|181513|181576			0.525571
111	12	GO Biological Process	GO:0031032	Actomyosin structure organization	1.64e-05	MYH9|EPB41L4A|TMOD3|ZYX|TPM1|MYH10|CSRP1|CNN3|ITGB1|KRT8|MYH14|NEB	6.73e-08	232344	181015|181363|181618|181642|181447|181348|181453|181381|180967|181264|181513|181576			0.478516
72	10	GO Biological Process	GO:0042273	Ribosomal large subunit biogenesis	2.33e-05	RPL35|RPL10A|RPL11|RPL24|RPL23A|FTSJ3|RPL6|DHX30|EBNA1BP2|NOP16	1.02e-07	232344	181240|181243|180937|181141|181567|181522|181585|181255|181045|181039			0.463264
19	6	GO Cellular Component	GO:0016460	Myosin ii complex	2.92e-05	MYH9|MYL1|MYH10|MYL6B|MYL12B|MYH14	6.31e-07	232344	181015|180997|181348|181426|181465|181513			0.453462
854	32	GO Biological Process	GO:0006396	RNA processing	3.28e-05	HNRNPL|DDX5|RPS16|RPL35|RBM6|MBNL2|MFAP1|MBNL1|PCBP1|KHDRBS1|SRSF7|RBM10|RPS7|CGI-74|KHDRBS3|HNRNPH1|SYNCRIP|HNRNPH2|RPL10A|LIN28A|RPL11|RPS6|DDX17|FTSJ3|HNRNPF|EBNA1BP2|RPS24|LARP7|HSPA8|SFSWAP|TAF15|HNRNPDL	1.52e-07	232344	181126|180910|181387|181240|181351|181531|181660|181261|180928|181195|181318|181258|181156|181306|181204|181546|180961|181630|181243|180931|180937|181597|181228|181522|181369|181045|181279|180964|181231|181483|181654|181579			0.448413
924	32	GO Cellular Component	GO:0005730	Nucleolus	3.63e-05	RPL19|DDX5|RPL35|POLR1A|RPS27A|RPS3|HSPA9|RPL13|RBM14|H1FX|RPS7|PPP1CC|RPS3A|GTF3C1|NOL12|SYNE1|LIN28A|RPL11|RPS6|DDX17|KDM5A|RPL23A|FTSJ3|EWSR1|ILF3|NOL7|EBNA1BP2|RPL23|HSPA8|RPS25|RPL36|NOP16	8.13e-07	232344	180901|180910|181240|181327|181312|181171|181006|181534|181285|181588|181156|181636|181183|181561|181336|180895|180931|180937|181597|181228|181309|181567|181522|180985|181657|181402|181045|180913|181231|181333|181174|181039			0.444009
1760	50	GO Biological Process	GO:0009888	Tissue development	4.12e-05	DCN|KRT14|DDX5|KRT9|KRT5|KRT1|KRT75|KRT6C|KRT6B|TRIM28|KRT10|CA2|FABP5|KRT16|UBB|KRT17|KRT2|PPARD|E2F7|KRT36|RPS7|ACTB|TPM1|MYH10|CSRP1|EMD|CNN3|KDM6A|KRT6A|CALML5|CEP152|KRT80|ITGB1|DDX17|CREB1|CCDC39|FGFR2|KRT3|CFL1|VIM|HOXC11|MYL6|CEP290|KRT4|KRT8|MYL6B|ENSP00000451560|TXNIP|MYH14|NEB	1.95e-07	232344	181375|180898|180910|181459|181087|181093|181096|181114|181123|181144|181507|181519|181186|181027|180982|181198|181339|181600|181423|181132|181156|181537|181447|181348|181453|181072|181381|181558|181036|181105|181210|181153|180967|181228|181303|180979|181009|181297|180925|181234|181477|181084|181528|181108|181264|181426|181603|181063|181513|181576			0.43851
96	10	GO Cellular Component	GO:0030863	Cortical cytoskeleton	5.1e-05	MYH9|ACTN4|DBN1|LASP1|PCLO|ACTB|UTRN|CTTN|NUMA1|CFL1	1.16e-06	232344	181015|181510|181288|181135|180919|181537|181273|180976|180970|180925			0.429243
2583	64	GO Biological Process	GO:0044085	Cellular component biogenesis	6.74e-05	KRT14|HIST1H4F|RPS16|KRT5|KRT1|ACTN4|APC|PDCL|RPL35|CAPZA1|PTPN23|KRT10|RPS27A|RPS3|GRID2|HSPA9|UBB|TMOD3|DNAH7|RBM14|CCDC114|PLEC|ZYX|H1FX|PCLO|RPS7|TUBB4B|CGI-74|HIST1H2BK|ACTB|TPM1|MYH10|CSRP1|RPL10A|RPL11|CTTN|HIST1H2BL|STAM|RPS6|CEP152|MYO1B|NUMA1|RPL24|LIMA1|ITGB1|DDX17|HPS4|NSF|DDX3X|ARPC4|RPL23A|FTSJ3|RPL6|DHX30|CCDC39|EBNA1BP2|RPS24|SFSWAP|CEP290|KRT8|RPS5|NOP16|NEFL|NEB	3.46e-07	232344	180898|181219|181387|181087|181093|181510|181372|180994|181240|181252|181090|181507|181312|181171|181159|181006|180982|181618|181492|181285|181504|181168|181642|181588|180919|181156|181150|181306|181237|181537|181447|181348|181453|181243|180937|180976|181081|181147|181597|181210|181414|180970|181141|181291|180967|181228|181180|181441|181621|180973|181567|181522|181585|181255|180979|181045|181279|…			0.417134
7026	132	GO Molecular Function	GO:0005515	Protein binding	8.27e-05	DCN|LGALS1|MYH9|DDX5|GAPDH|TPI1|HIST1H4F|KRT5|KRT1|ACTN4|TRIM28|APC|DOCK10|EPB41L4A|TEP1|CAPZA1|EED|PTPN23|MESDC1|KRT10|RPS27A|RPS3|GRID2|ITGA1|MYO5B|CCNB2|DBN1|ZNF250|ALB|HSPA9|FABP5|PPIB|GCN1L1|MUC17|HIST1H2AE|UBB|IRS1|PCBP1|TMOD3|KRT2|PPARD|DNAH7|SNTG2|KHDRBS1|E2F7|PLEC|TRIM25|HSPA5|LASP1|SRSF7|HBG1|RBM10|H1FX|HBB|PCLO|TUBA1B|RPS7|TUBB4B|PPP1CC|PTMA|SLC12A6|CGI-74|KHDRBS3|HIST1H2BK|ACTB|TPM1|S…	2.69e-07	232344	181375|181378|181015|180910|181000|181207|181219|181087|181093|181510|181144|181372|181330|181363|181057|181252|181549|181090|180949|181507|181312|181171|181159|180952|181048|180946|181288|181417|181294|181006|181186|181486|180988|180940|180934|180982|181189|180928|181618|181339|181600|181492|181354|181195|181423|181168|181120|181018|181135|181318|181201|181258|181588|181282|180919|181411|181156|…			0.408249
5389	107	GO Biological Process	GO:0048519	Negative regulation of biological process	0.00014	DCN|LGALS1|MYH9|HNRNPL|RPL19|DDX5|GAPDH|HIST1H4F|MT2A|RPS16|KRT1|ACTN4|HBZ|TRIM28|PTPRE|APC|PDCL|RPL35|RPL8|PHLPP1|CAPZA1|EED|POLR1A|PTPN23|RPS27A|RPS3|GRID2|ITGA1|LRRTM1|ALB|HSPA9|FABP5|PRDX2|KRT16|HIST1H2AE|UBB|IRS1|RPL13|TMOD3|PPARD|RBM14|KHDRBS1|RPLP2|E2F7|TRIM25|HSPA5|SRSF7|RBM10|H1FX|RPS7|DTNBP1|PTMA|RPL27A|RPL21|RPS3A|FRMD4A|HMGN5|TPM1|RPL39|SYNCRIP|EMD|ODF2L|RPL10A|ZWINT|LIN28A|TXN|RPL11|…	7.74e-07	232344	181375|181378|181015|181126|180901|180910|181000|181219|181012|181387|181093|181510|181246|181144|181102|181372|180994|181240|181396|181024|181252|181549|181327|181090|181312|181171|181159|180952|181450|181294|181006|181186|181051|181027|180934|180982|181189|181534|181618|181600|181285|181195|181216|181423|181120|181018|181318|181258|181588|181156|181564|181192|181393|181360|181183|181525|181474|…			0.385387
24	6	GO Molecular Function	GO:0030898	Actin-dependent atpase activity	0.00058	MYH9|MYO5B|MYH10|MYO1B|MYL6|MYH14	2e-06	232344	181015|181048|181348|181414|181084|181513			0.323657
82	9	GO Molecular Function	GO:0003727	Single-stranded rna binding	0.00074	DAZAP1|KHDRBS1|RPS7|HNRNPH1|SYNCRIP|DDX3X|HNRNPF|ILF3|HNRNPDL	2.71e-06	232344	181111|181195|181156|181546|180961|181621|181369|181657|181579			0.313077
43	7	GO Molecular Function	GO:0008307	Structural constituent of muscle	0.00085	MYL1|PLEC|TPM1|CSRP1|MYL6|MYL6B|NEB	3.43e-06	232344	180997|181168|181447|181453|181084|181426|181576			0.307058
47	7	GO Biological Process	GO:0035722	interleukin-12-mediated signaling pathway	0.00094	CAPZA1|HSPA9|HNRNPF|PPIA|CA1|CFL1|HNRNPDL	5.83e-06	232344	181252|181006|181369|181021|181429|180925|181579			0.302687
238	13	GO Cellular Component	GO:0043292	Contractile fiber	0.00098	ACTN4|MYL1|TMOD3|PLEC|TPM1|SYNE1|CSRP1|TPM3|CAPZB|KRT8|MYL6B|MYL12B|NEB	2.48e-05	232344	181510|180997|181618|181168|181447|180895|181453|181129|181321|181264|181426|181465|181576			0.300877
735	26	GO Biological Process	GO:0070925	Organelle assembly	0.001	PTPN23|RPS3|TMOD3|DNAH7|RBM14|CCDC114|TUBB4B|TPM1|MYH10|CSRP1|RPL11|STAM|CEP152|NUMA1|RPL24|ITGB1|HPS4|DDX3X|RPL23A|RPL6|DHX30|CCDC39|CEP290|KRT8|RPS5|NEB	6.57e-06	232344	181090|181171|181618|181492|181285|181504|181150|181447|181348|181453|180937|181147|181210|180970|181141|180967|181180|181621|181567|181585|181255|180979|181528|181264|181300|181576			0.3
17	5	GO Biological Process	GO:0099188	Postsynaptic cytoskeleton organization	0.0012	DBN1|ACTB|MYH10|CTTN|NEFL	7.6e-06	232344	181288|181537|181348|180976|181582			0.292082
479	20	GO Biological Process	GO:0061061	Muscle structure development	0.0013	DCN|LGALS1|MYH9|DDX5|MBNL1|TMOD3|TPM1|MYH10|SYNE1|CSRP1|UTRN|EMD|ITGB1|DDX17|FGFR2|MYL6|KRT8|MYL6B|MYH14|NEB	8.3e-06	232344	181375|181378|181015|180910|181261|181618|181447|181348|180895|181453|181273|181072|180967|181228|181009|181084|181264|181426|181513|181576			0.288606
115	9	GO Cellular Component	GO:0072562	Blood microparticle	0.0013	HBA2|KRT1|ALB|HBB|ACTB|POTEF|HBG2|HBD|HSPA8	3.39e-05	232344	181633|181093|181294|181282|181537|181456|181462|181645|181231			0.288606
393	18	GO Molecular Function	GO:0016887	ATPase activity	0.0017	MYH9|DDX5|MSH4|MYO5B|HSPA9|DNAH7|HSPA5|MYH10|MYO1B|DDX17|NSF|DDX3X|DHX30|C10orf88|HSPA8|MYL6|MYH14|CHD1	7.21e-06	232344	181015|180910|181162|181048|181006|181492|181018|181348|181414|181228|181441|181621|181255|181138|181231|181084|181513|181060			0.276955
294	15	GO Biological Process	GO:0000398	mRNA splicing, via spliceosome	0.0019	HNRNPL|DDX5|RBM6|MFAP1|PCBP1|SRSF7|RBM10|CGI-74|HNRNPH1|SYNCRIP|HNRNPH2|DDX17|HNRNPF|HSPA8|SFSWAP	1.28e-05	232344	181126|180910|181351|181660|180928|181318|181258|181306|181546|180961|181630|181228|181369|181231|181483			0.272125
425	17	GO Cellular Component	GO:0031252	Cell leading edge	0.0024	MYH9|APC|RPS3|DBN1|ACTB|TPM1|MYH10|ENAH|CTTN|LIMA1|ITGB1|DDX3X|CFL1|VIM|ENSP00000451560|GABRG3|CLIP1	6.66e-05	232344	181015|181372|181171|181288|181537|181447|181348|180943|180976|181291|180967|181621|180925|181234|181603|181357|181555			0.261979
230	13	GO Biological Process	GO:0043903	Regulation of symbiotic process	0.0025	LGALS1|DDX5|GAPDH|TRIM28|PPIB|TRIM25|KRT6A|DDX3X|ILF3|PPIA|HSPA8|CFL1|CHD1	1.76e-05	232344	181378|180910|181000|181144|181486|181120|181036|181621|181657|181021|181231|180925|181060			0.260206
2193	50	GO Cellular Component	GO:0120025	Plasma membrane bounded cell projection	0.0028	MYH9|ACTN4|APC|DOCK10|PDCL|BLVRB|PTPN23|RPS3|GRID2|ITGA1|CA2|DBN1|LRRTM1|UBB|DNAH7|CCDC114|PCLO|DTNBP1|PPP1CC|ACTB|TPM1|SDF4|MYH10|ENAH|UTRN|CNN3|ODF2L|WDR78|ZWINT|CTTN|PKHD1L1|RPS6|MYO1B|NUMA1|LIMA1|ITGB1|NSF|DDX3X|CREB1|CCDC39|HSPA8|CFL1|VIM|CEP290|ENSP00000451560|MYH14|GABRG3|CLIP1|NEFL|CDHR1	7.9e-05	232344	181015|181510|181372|181330|180994|181042|181090|181171|181159|180952|181519|181288|181450|180982|181492|181504|180919|181564|181636|181537|181447|181594|181348|180943|181273|181381|181615|181033|181399|180976|181420|181597|181414|180970|181291|180967|181441|181621|181303|180979|181231|180925|181234|181528|181603|181513|181357|181555|181582|181408			0.255284
3696	76	GO Biological Process	GO:0044267	Cellular protein metabolic process	0.0033	DCN|RCN1|LGALS1|RPL19|GAPDH|HIST1H4F|RPS16|KRT1|TRIM28|PTPRE|APC|RPL35|RPL8|PHLPP1|EED|PTPN23|KRT10|RPS27A|RPS3|ALB|PPIB|GCN1L1|MUC17|UBB|IRS1|RPL13|MRPL48|KRT2|RBM14|RPLP2|TRIM25|HSPA5|PPIL2|RPS7|PPP1CC|RPL27A|RPL21|RPS3A|HIST1H2BK|ACTB|RPL39|DAP3|RPL10A|RPL11|PIM2|HIST1H2BL|STAM|KDM6A|RPS6|PARP4|GALNT13|CUL5|RPL24|KDM5A|DDX3X|CREB1|RPL23A|RPL17|RPL6|ILF3|RPL36A|FGFR2|RPS24|RPL32|RPL37A|RPL29|PP…	2.35e-05	232344	181375|181276|181378|180901|181000|181219|181387|181093|181144|181102|181372|181240|181396|181024|181549|181090|181507|181312|181171|181294|181486|180988|180940|180982|181189|181534|181054|181339|181285|181216|181120|181018|181003|181156|181636|181393|181360|181183|181237|181537|181222|181627|181243|180937|181315|181081|181147|181558|181597|181165|181225|181435|181141|181309|181621|181303|181567|…			0.248149
23	5	GO Biological Process	GO:1901798	Positive regulation of signal transduction by p53 class mediator	0.0036	DDX5|UBB|RPS7|RPL11|RPL23	2.66e-05	232344	180910|180982|181156|180937|180913			0.24437
61	7	GO Biological Process	GO:0042255	Ribosome assembly	0.0037	RPL11|RPL24|DDX3X|RPL23A|RPL6|DHX30|RPS5	2.74e-05	232344	180937|181141|181621|181567|181585|181255|181300			0.24318
4042	81	GO Biological Process	GO:0065008	Regulation of biological quality	0.0038	DCN|LGALS1|MYH9|GAPDH|HIST1H4F|MT2A|LRFN1|KRT1|HBZ|APC|DOCK10|LPO|TEP1|CAPZA1|RPS27A|GRID2|ITGA1|MYO5B|CA2|CCNB2|DBN1|LRRTM1|ALB|HSPA9|FABP5|PPIB|PRDX2|KRT16|MUC17|UBB|IRS1|TMOD3|PPARD|HSPA5|YLPM1|HBG1|RBM10|OIT3|HBB|PCLO|RPS7|DTNBP1|SLC12A6|ACTB|POTEF|TPM1|MYH10|SYNE1|CSRP1|SYNCRIP|LIN28A|TXN|RPL11|PIM2|CTTN|HBG2|HBD|RPS6|LIMA1|ATP6V1C1|ITGB1|HPS4|DDX3X|TXNRD2|MEX3D|CREB1|ARPC4|CAPZB|RPS24|RPL23…	2.84e-05	232344	181375|181378|181015|181000|181219|181012|180958|181093|181246|181372|181330|181099|181057|181252|181312|181159|180952|181048|181519|180946|181288|181450|181294|181006|181186|181486|181051|181027|180940|180982|181189|181618|181600|181018|181468|181201|181258|180904|181282|180919|181156|181564|181471|181537|181456|181447|181348|180895|181453|180961|180931|181540|180937|181315|180976|181462|181645|…			0.242022
439	18	GO Biological Process	GO:0042060	Wound healing	0.004	DCN|MYH9|CAPZA1|PPARD|PLEC|HBG1|HBB|DTNBP1|ACTB|TPM1|MYH10|CSRP1|KRT6A|HBG2|HBD|HPS4|CAPZB|FGFR2	2.98e-05	232344	181375|181015|181252|181600|181168|181201|181282|181564|181537|181447|181348|181453|181036|181462|181645|181180|181321|181009			0.239794
241	12	GO Cellular Component	GO:0035770	Ribonucleoprotein granule	0.0041	HNRNPL|MBNL1|PCBP1|TRIM25|ACTB|SYNE1|TIAL1|LIN28A|RPS6|DDX3X|RPL6|DHX30	0.00012	232344	181126|181261|180928|181120|181537|180895|180907|180931|181597|181621|181585|181255			0.238722
248	13	GO Biological Process	GO:0006936	Muscle contraction	0.0048	ITGA1|MYL1|TMOD3|TPM1|UTRN|TPM3|EMD|VIM|MYL6|MYL6B|MYL12B|MYH14|NEB	3.72e-05	232344	180952|180997|181618|181447|181273|181129|181072|181234|181084|181426|181465|181513|181576			0.231876
86	8	GO Molecular Function	GO:0003730	mRNA 3-UTR binding	0.0062	HNRNPL|DDX5|DAZAP1|RPS7|TIAL1|MEX3D|ILF3|TAF15	2.96e-05	232344	181126|180910|181111|181156|180907|181030|181657|181654			0.220761
62	7	GO Molecular Function	GO:0019843	rRNA binding	0.0062	RPL8|RPS3|NOL12|RPL11|RPL23A|RPL23|RPS5	3.01e-05	232344	181396|181171|181336|180937|181567|180913|181300			0.220761
11	4	GO Molecular Function	GO:0005522	Profilin binding	0.0064	DBN1|PCLO|ENAH|CTTN	3.32e-05	232344	181288|180919|180943|180976			0.219382
26	5	GO Molecular Function	GO:0048027	mRNA 5-UTR binding	0.0083	RPS7|RPS3A|MYH10|SYNCRIP|DDX3X	4.46e-05	232344	181156|181183|181348|180961|181621			0.208092
14	4	GO Molecular Function	GO:0030280	Structural constituent of skin epidermis	0.0123	KRT1|KRT10|KRT2|KRT36	7.21e-05	232344	181093|181507|181339|181132			0.191009
5	3	GO Biological Process	GO:0051546	Keratinocyte migration	0.0137	KRT16|KRT2|PPARD	0.00011	232344	181027|181339|181600			0.186328
75	7	GO Molecular Function	GO:0003725	Double-stranded rna binding	0.015	MBNL1|TUBA1B|TUBB4B|DDX3X|ILF3|DHX30|VIM	9.2e-05	232344	181261|181411|181150|181621|181657|181255|181234			0.182391
312	14	GO Molecular Function	GO:0044389	Ubiquitin-like protein ligase binding	0.015	TPI1|TRIM28|APC|RPS27A|HSPA9|UBB|HSPA5|TUBA1B|RPL11|STAM|CUL5|RPL23|HSPA8|TXNIP	9.36e-05	232344	181207|181144|181372|181312|181006|180982|181018|181411|180937|181147|181435|180913|181231|181063			0.182391
368	15	GO Biological Process	GO:1902903	Regulation of supramolecular fiber organization	0.0173	APC|CAPZA1|RPS3|DBN1|TMOD3|TPM1|CTTN|NUMA1|LIMA1|ARPC4|CAPZB|HSPA8|CFL1|CLIP1|TESK1	0.00015	232344	181372|181252|181171|181288|181618|181447|180976|180970|181291|180973|181321|181231|180925|181555|181612			0.176195
104	7	GO Cellular Component	GO:0042470	Melanosome	0.0191	PPIB|HSPA5|DTNBP1|ITGB1|HPS4|HSPA8|CALU	0.0006	232344	181486|181018|181564|180967|181180|181231|181342			0.171897
614	20	GO Biological Process	GO:0032989	Cellular component morphogenesis	0.0261	DOCK10|ITGA1|DBN1|UBB|TMOD3|DTNBP1|ACTB|TPM1|MYH10|ENAH|CSRP1|CTTN|ITGB1|CREB1|FGFR2|KRT8|ENSP00000451560|MYH14|NEFL|NEB	0.00023	232344	181330|180952|181288|180982|181618|181564|181537|181447|181348|180943|181453|180976|180967|181303|181009|181264|181603|181513|181582|181576			0.158336
53	5	GO Cellular Component	GO:0032154	Cleavage furrow	0.0278	MYH9|PPP1CC|MYH10|LIMA1|ITGB1	0.00091	232344	181015|181636|181348|181291|180967			0.155596
2	2	GO Cellular Component	GO:0034665	Integrin alpha1-beta1 complex	0.0297	ITGA1|ITGB1	0.00098	232344	180952|180967			0.152724
41	5	GO Biological Process	GO:0045684	Positive regulation of epidermis development	0.0341	KRT10|KRT17|KRT2|PPARD|NUMA1	0.00031	232344	181507|181198|181339|181600|180970			0.146725
93	7	GO Biological Process	GO:0051702	Interaction with symbiont	0.0351	GAPDH|PPIB|KRT6A|DCD|HSPA8|CFL1|CHD1	0.00032	232344	181000|181486|181036|181366|181231|180925|181060			0.145469
3485	68	GO Biological Process	GO:0006950	Response to stress	0.0392	DCN|LGALS1|MYH9|HNRNPL|GAPDH|HIST1H4F|MT2A|HBA2|KRT1|ACTN4|TRIM28|APC|LPO|PHLPP1|CAPZA1|MSH4|RPS27A|RPS3|CA2|ALB|HSPA9|GCN1L1|PRDX2|KRT16|UBB|PPARD|RBM14|ARFGAP1|E2F7|PLEC|TRIM25|HSPA5|ZYX|HBG1|HBB|TUBB4B|DTNBP1|SLC12A6|HIST1H2BK|ACTB|TPM1|MYH10|TBKBP1|RPL39|CSRP1|TIAL1|SYNCRIP|TXN|KRT6A|HBG2|HBD|PARP4|KIR3DL1|ITGB1|DDX17|HPS4|DDX3X|TXNRD2|CREB1|CAPZB|ILF3|DCD|FGFR2|HSPA8|VIM|KRT8|TXNIP|NEFL	0.00036	232344	181375|181378|181015|181126|181000|181219|181012|181633|181093|181510|181144|181372|181099|181024|181252|181162|181312|181171|181519|181294|181006|180988|181051|181027|180982|181600|181285|181639|181423|181168|181120|181018|181642|181201|181282|181150|181564|181471|181237|181537|181447|181348|181438|181222|181453|180907|180961|181540|181036|181462|181645|181165|181489|180967|181228|181180|181621|…			0.140671
21	4	GO Molecular Function	GO:0008143	poly(A) binding	0.0392	KHDRBS1|SYNCRIP|DDX3X|HNRNPDL	0.00028	232344	181195|180961|181621|181579			0.140671
195	9	GO Cellular Component	GO:0030427	Site of polarized growth	0.0409	DBN1|LRRTM1|DTNBP1|MYH10|UTRN|CTTN|ENSP00000451560|MYH14|NEFL	0.0014	232344	181288|181450|181564|181348|181273|180976|181603|181513|181582			0.138828
23	4	GO Biological Process	GO:0048025	Negative regulation of mrna splicing, via spliceosome	0.041	HNRNPL|SRSF7|RBM10|SFSWAP	0.00038	232344	181126|181318|181258|181483			0.138722
1013	27	GO Biological Process	GO:0071345	Cellular response to cytokine stimulus	0.049	GAPDH|MT2A|ACTN4|CAPZA1|EED|PTPN23|RPS27A|RPS3|HSPA9|UBB|IRS1|TRIM25|HSPA5|ZYX|SRSF7|TUBA1B|SYNCRIP|ITGB1|CREB1|HNRNPF|PPIA|CA1|HSPA8|CFL1|VIM|KRT8|HNRNPDL	0.00045	232344	181000|181012|181510|181252|181549|181090|181312|181171|181006|180982|181189|181120|181018|181642|181318|181411|180961|180967|181303|181369|181021|181429|181231|180925|181234|181264|181579			0.13098

## Sheet: Ex. Data Table 3
Extended Data Table 3 | Proteins identified by Inactive Catalytic Domain Capture (ICDC) that interact with SARS-CoV-2 main protease, 3CLpro. Predicted cleavage sites were the canonical 3CLpro sites LQ↓G/A/S or LH↓G/A/S. Cumulative evidence to suggest that 3CLpro interacts with, and by extension could cleave, proteins to regulate cytoskeleton and the formation of cell projections. Gene ontology (G…
3CLpro interactome from ICDC					Enrichment data and data mining
Protein Accession	Protein Gene	Protein Description	Number of predicted cleavage sites	MW	Cytoskeletal organization GO:0007010	Actin cytoskeleton (GO:0015629)	Plasma membrane bounded cell projection GO:0120025	Pseudopodia component	TEAD bound
A0A0B4J269	A0A0B4J269	G_PROTEIN_RECEP_F1_2 domain-containing protein	2	88.3818			
P60709	ACTB	Actin, cytoplasmic 1	0	41.74					
Q8TC94	ACTL9	Actin-like protein 9	1	45.6273					
O43707	ACTN4	Alpha-actinin-4	0	104.854					
P02768	ALB	Albumin	0	66.47				
P25054	APC	Adenomatous polyposis coli protein	6	311.51					
Q8N6T3	ARFGAP1	ADP-ribosylation factor GTPase-activating protein 1	0	44.67				
P59998	ARPC4	Actin-related protein 2/3 complex subunit 4	1	19.54				
H7C0C1	ATP5PO	ATP synthase subunit O, mitochondrial	0	23.28				
P21283	ATP6V1C1	V-type proton ATPase subunit C 1	1	43.81					
P30043	BLVRB	Flavin reductase (NADPH)	2	21.99				
P00918	CA2	Carbonic anhydrase 2	0	29.11			
Q9NZT1	CALML5	Calmodulin-like protein 5	0	15.76	
O43852	CALU	Calumenin	0	34.96					
P52907	CAPZA1	F-actin-capping protein subunit alpha-1	0	32.79				
P47756	CAPZB	F-actin-capping protein subunit beta	0	31.22				
Q96M63	CCDC114	Coiled-coil domain-containing protein 114	1	75.05			
Q9UFE4	CCDC39	Coiled-coil domain-containing protein 39	1	109.9			
Q96JP9	CDHR1	Cadherin-related family member 1	1	91.43			
O94986	CEP152	Centrosomal protein of 152 kDa	2	195.626	
O15078	CEP290	Centrosomal protein of 290 kDa	5	290.39					
P23528	CFL1	Cofilin-1	1	18.37					
P30622	CLIP1	CAP-Gly domain-containing linker protein 1	2	162.25					
Q15417	CNN3	Calponin-3	0	36.41				
P16220	CREB1	Cyclic AMP-responsive element-binding protein 1	0	35.14					
P21291	CSRP1	Cysteine and glycine-rich protein 1	0	20.57					
Q14247	CTTN	Src substrate cortactin	0	61.59					
Q16643	DBN1	Drebrin	1	71.3				
P81605	DCD	Dermcidin;Survival-promoting peptide;DCD-1	0	9.26					
O00571	DDX3X	ATP-dependent RNA helicase DDX3X	0	73.11				
P17844	DDX5	Probable ATP-dependent RNA helicase DDX5	0	69.15					
Q8WXX0	DNAH7	Dynein heavy chain 7, axonemal	4	461.16					
Q96BY6	DOCK10	Dedicator of cytokinesis protein 10	3	249.53					
Q96EV8	DTNBP1	Dysbindin	0	39.49					
Q99848	EBNA1BP2	Probable rRNA-processing protein EBP2	0	34.8519					
Q8N8S7	ENAH	Protein enabled homolog	1	66.5103					
Q99928	GABRG3	Gamma-aminobutyric acid receptor subunit gamma-3	2	52.47			
P04406	GAPDH	Glyceraldehyde-3-phosphate dehydrogenase	1	35.92				
O43424	GRID2	Glutamate receptor ionotropic, delta-2	1	110.62					
A0A0U1RRH7	H2AC4	Histone H2A type 1-B/E	0	18.5526				
Q99880	HIST1H2BL	Histone H2B type 1-L	0	13.821					
P62805	HIST1H4A	Histone H4	0	11.2362				
P52597	HNRNPF	Heterogeneous nuclear ribonucleoprotein F	0	45.67					
P31943	HNRNPH1	Heterogeneous nuclear ribonucleoprotein H	0	49.23				
P14866	HNRNPL	Heterogeneous nuclear ribonucleoprotein L	0	64.1328					
P11021	HSPA5	78 kDa glucose-regulated protein	0	70.48				
P11142	HSPA8	Heat shock cognate 71 kDa protein	1	70.77				
P38646	HSPA9	Stress-70 protein, mitochondrial	0	68.759				
Q12906	ILF3	Interleukin enhancer-binding factor 3	1	95.34				
P35568	IRS1	Insulin receptor substrate 1	0	131.59					
P56199	ITGA1	Integrin alpha-1	0	127.837					
P05556	ITGB1	Integrin beta-1	0	86.19				
P04264	KRT1	Keratin, type II cytoskeletal 1	1	65.91				
P13645	KRT10	Keratin, type I cytoskeletal 10	1	58.83				
P02533	KRT14	Keratin, type I cytoskeletal 14	1	51.56				
P08779	KRT16	Keratin, type I cytoskeletal 16	2	51.27	
Q04695	KRT17	Keratin, type I cytoskeletal 17	1	48.11					
P35908	KRT2	Keratin, type II cytoskeletal 2 epidermal	2	65.43	
P12035	KRT3	Keratin, type II cytoskeletal 3	2	64.42	
P19013	KRT4	Keratin, type II cytoskeletal 4	1	56.14	
P13647	KRT5	Keratin, type II cytoskeletal 5	0	62.38	
P02538	KRT6A	Keratin, type II cytoskeletal 6A	2	59.91	
P48668	KRT6C	Keratin, type II cytoskeletal 6C	2	59.89	
P05787	KRT8	Keratin, type II cytoskeletal 8	3	53.7					
P35527	KRT9	Keratin, type I cytoskeletal 9	1	62.06				
Q14847	LASP1	LIM and SH3 domain protein 1	1	29.72					
Q9UHB6	LIMA1	LIM domain and actin-binding protein 1	1	85.23					
Q93052	LPP	Lipoma-preferred partner	0	65.75		
Q86UE6	LRRTM1	Leucine-rich repeat transmembrane neuronal protein 1	3	54.8318			
Q9Y383	LUC7L2	Putative RNA-binding protein Luc7-like 2	1	46.51					
Q6WCQ1	MPRIP	Myosin phosphatase Rho-interacting protein	2	116.4					
P35580	MYH10	Myosin-10	10	229				
Q7Z406	MYH14	Myosin-14	6	227.739			
P35579	MYH9	Myosin-9	12	226.4				
P05976	MYL1	Myosin light chain 1/3, skeletal muscle isoform	0	21.01		
O14950	MYL12B	Myosin regulatory light chain 12B	0	19.78					
P60660	MYL6	Myosin light polypeptide 6	0	16.93				
P14649	MYL6B	Myosin light chain 6B	1	22.76		
O43795	MYO1B	Unconventional myosin-Ib	1	131.99					
Q9ULV0	MYO5B	Unconventional myosin-Vb	1	213.67					
P20929	NEB	Nebulin	27	772.91		
P07196	NEFL	Neurofilament light polypeptide	3	61.52			
P46459	NSF	Vesicle-fusing ATPase	1	82.5944					
Q14980	NUMA1	Nuclear mitotic apparatus protein 1	13	238.26			
Q9ULJ1	ODF2L	Outer dense fiber protein 2-like	2	73.73			
Q15365	PCBP1	Poly(rC)-binding protein 1	0	37.5				
Q9Y6V0	PCLO	Protein piccolo	9	560.7					
Q13371	PDCL	Phosducin-like protein	0	34.15			
Q86WI1	PKHD1L1	Fibrocystin-L	10	463.61				
Q15149	PLEC	Plectin	14	531.79					
P62937	PPIA	Peptidyl-prolyl cis-trans isomerase A	0	18.01				
P23284	PPIB	Peptidyl-prolyl cis-trans isomerase B	0	20.29				
P36873	PPP1CC	Serine/threonine-protein phosphatase PP1-gamma catalytic subunit	0	36.85			
P32119	PRDX2	Peroxiredoxin-2	0	21.76					
P06454	PTMA	Prothymosin alpha	0	12.2					
Q9H3S7	PTPN23	Tyrosine-protein phosphatase non-receptor type 23	3	178.974			
Q96PK6	RBM14	RNA-binding protein 14	1	69.49	
P62913	RPL11	60S ribosomal protein L11	0	20.12					
P26373	RPL13	60S ribosomal protein L13	1	24.26				
P18621	RPL17-C18orf32;RPL17	60S ribosomal protein L17	0	26.37				
P84098	RPL19	60S ribosomal protein L19	1	23.47				
P46778	RPL21	60S ribosomal protein L21	0	18.43				
P62829	RPL23	60S ribosomal protein L23	0	14.87					
P62750	RPL23A	60S ribosomal protein L23a	0	17.5639					
P83731	RPL24	60S ribosomal protein L24	0	17.78				
P42766	RPL35	60S ribosomal protein L35	0	14.42					
P61513	RPL37A	60S ribosomal protein L37a	0	10.2752					
P62891	RPL39	60S ribosomal protein L39	0	6.41					
Q02878	RPL6	60S ribosomal protein L6	1	32.6				
P62917	RPL8	60S ribosomal protein L8	0	27.89				
P05387	RPLP2	60S acidic ribosomal protein P2	0	11.66				
H3BN98	RPS15A	40S ribosomal protein S15a	0	14.71				
P62249	RPS16	40S ribosomal protein S16	1	16.31				
H3BNC9	RPS17	40S ribosomal protein S17	0	15.42				
P62847	RPS24	40S ribosomal protein S24	0	15.42					
P62851	RPS25	40S ribosomal protein S25	0	13.74				
P62979	RPS27A	Ubiquitin-40S ribosomal protein S27a	0	8.56					
P23396	RPS3	40S ribosomal protein S3	0	26.56					
P61247	RPS3A	40S ribosomal protein S3a	1	29.81				
P46782	RPS5	40S ribosomal protein S5	0	22.88				
P62753	RPS6	40S ribosomal protein S6	0	28.68			
P62081	RPS7	40S ribosomal protein S7	0	22.13				
Q15404	RSU1	Ras suppressor protein 1	0	31.41				
Q9BRK5	SDF4	45 kDa calcium-binding protein	0	37.925			
Q16629	SRSF7	Serine/arginine-rich splicing factor 7	0	27.37					
Q92783	STAM	Signal transducing adapter molecule 1	2	59.05					
Q8NF91	SYNE1	Nesprin-1	38	1011.09				
Q92804	TAF15	TATA-binding protein-associated factor 2N	0	61.83				
Q15569	TESK1	Dual specificity testis-specific protein kinase 1	2	67.68	
Q9H1K6	TLNRD1	Talin rod domain-containing protein 1 (MESDC1)	0	37.63		
Q9NYL9	TMOD3	Tropomodulin-3	0	39.59		
P60174	TPI1	Triosephosphate isomerase	0	26.5383				
P09493	TPM1	Tropomyosin alpha-1 chain	0	32.71				
P06753	TPM3	Tropomyosin alpha-3 chain	0	32.82				
Q14258	TRIM25	E3 ubiquitin/ISG15 ligase TRIM25	1	70.97				
Q13263	TRIM28	Transcription intermediary factor 1-beta	1	88.42				
P68363	TUBA1B	Tubulin alpha-1B chain	1	50.15				
P68371	TUBB4B	Tubulin beta-4B chain	2	49.83				
P10599	TXN	Thioredoxin	0	11.61					
P0CG47	UBB	Polyubiquitin-B	0	8.56				
P46939	UTRN	Utrophin	4	394.47					
P08670	VIM	Vimentin	2	53.52				
Q5VTH9	WDR78	WD repeat-containing protein 78	0	94.57			
O95229	ZWINT	ZW10 interactor	2	31.29			
Q15942	ZYX	Zyxin	1	61.15		

## Sheet: Ex. Data Table 4
Extended Data Table 4 | Cleavage of peptides spanning potential 3CLpro cleavage sites in our multiplex mass spectrometry cleavage assay. Sequences of 14-mer peptides with the sequence AA(X1–X8)YAYR, with X1–X8 being the P4–P4’ sequence of canonical 3CLpro cleavage sites (LQ↓G/A/S and LH↓G/A/S, plus 5 peptides with IQ↓A/S) in 3CLpro interactors from Extended Data Table 1 as well as IQGAP1. Peptide…
Peptide	Cleavage site	Protein	app(kcat/KM) (M-1s-1)	Binned app(kcat/KM) (M-1s-1)
Peptides from the known substrate GOLGA3
AAEALQSLRLYAYR	EALQ122↓SLRL	GOLGA3	28.1767	>13
AADVLQAAAAYAYR	DVLQ366↓AAAA	GOLGA3	17.773	>13
AAGELQGEAAYAYR	GELQ758↓GEAA	GOLGA3	1.13593	<13
AAAALQAAKSYAYR	AALQ783↓AAKS	GOLGA3	1559.67	>1300
AAGHLQSAQKYAYR	GHLQ923↓SAQK	GOLGA3	1539.76	>1300
AAQALQASLEYAYR	QALQ1178↓ASLE	GOLGA3	270.668	>130
Peptides from proteins in interactome that are predicted substrates
AAKQLQGSIEYAYR	KQLQ52↓GSIE	APC	2.94705	<13
AAQLLQSQATYAYR	QLLQ236↓SQAT	APC	122.45	>13
AAGGLQAIAEYAYR	GGLQ473↓AIAE	APC	41.2588	>13
AASRLQGSSLYAYR	SRLQ1338↓GSSL	APC	1522.06	>1300
AAARLQAVANYAYR	ARLQ751↓AVAN	ARMCX4	1514.27	>1300
AADVLQAADVYAYR	DVLQ57↓AADV	BLVRB	1567.22	>1300
AAPRLQAVTDYAYR	PRLQ126↓AVTD	BLVRB	18.633	>13
AAEMLHSKAEYAYR	EMLH576↓SKAE	CCDC39	38.5082	>13
AAEVLQSINPYAYR	EVLQ149↓SINP	CCNB2	45.3037	>13
AASNLQGCVTYAYR	SNLQ136↓GCVT	CFL1	613.8	>130
AASTLQGEPRYAYR	STLQ490↓GEPR	DBN1	1347.07	>1300
AAGPLQGRRSYAYR	GPLQ298↓GRRS	DOCK10	11.5525	<13
AATDLQAFSMYAYR	TDLQ510↓AFSM	E2F7	1357.7	>1300
AAPQLQSQPSYAYR	PQLQ817↓SQPS	E2F7	1513.66	>1300
AARLLQSYVDYAYR	RLLQ136↓SYVD	EED	13.5911	>13
AARALQAAIQYAYR	RALQ71↓AAIQ	GCN1	111.005	>13
AAHSLQSSGIYAYR	HSLQ94↓SSGI	GCN1	39.836	>13
AATLLQALDLYAYR	TLLQ461↓ALDL	GCN1	1481.46	>1300
AAEMLQAQLDYAYR	EMLQ835↓AQLD	GCN1	38.5082	>13
AAEQLHSTIGYAYR	EQLH2033↓STIG	GCN1	0	<1
AATMLQALRHYAYR	TMLQ2406↓ALRH	GCN1	1545.82	>1300
AARFLQAVSLYAYR	RFLQ631↓AVSL	HPS4	56.5962	>13
AAEILQSVDDYAYR	EILQ149↓SVDD	ILF3	2.59606	<13
AAIELQSQLAYAYR	IELQ380↓SQLA	KRT10	203.195	>130
AAVELQSKVDYAYR	VELQ300↓SKVD	KRT2	1538.65	>1300
AAQRLQGEIAYAYR	QRLQ407↓GEIA	KRT2	56.63	>13
AASRLQAEIEYAYR	SRLQ318↓AEIE	KRT8	538.367	>130
AASELQSQVRYAYR	SELQ81↓SQVR	LASP1	1540.2	>1300
AAASLHGRIYYAYR	ASLH433↓GRIY	LIMA1	991.11	>130
AAEELQSVQYAYR	EELQ814↓SVQR	MPRIP	8.56	<13
AAQLLQANPIYAYR	QLLQ213↓ANPI	MYH9	38.5082	>13
AAETLQSQLMYAYR	ETLQ875↓SQLM	MYH9	12.4891	<13
AAEQLQAETEYAYR	EQLQ890↓AETE	MYH9	0.03	<1
AAQHLQAEKKYAYR	QHLQ935↓AEKK	MYH9	11.5525	<13
AAAELQAQIAYAYR	AELQ1068↓AQIA	MYH9	960.797	>130
AAEELQAALAYAYR	EELQ1086↓AALA	MYH9	0.991627	<1
AAVLLQGKGDYAYR	VLLQ1238↓GKGD	MYH9	1472.9	>1300
AAATLHAQVAYAYR	ATLH1363↓AQVA	MYH9	1493.59	>1300
AADELQATEDYAYR	DELQ1549↓ATED	MYH9	1.65	<13
AAVNLQAMKAYAYR	VNLQ1563↓AMKA	MYH9	1598.81	>1300
AARDLQGRDEYAYR	RDLQ1574↓GRDE	MYH9	<1	<1
AARKLQAQMKYAYR	RKLQ1644↓AQMK	MYH9	12.0968	<13
AAPMLQAVAKYAYR	PMLQ132↓AVAK	MYL6B	1533.72	>1300
AAQLLQSNPVYAYR	QLLQ144↓SNPV	MYO1B	14.4406	>13
AAAQLQAQSLYAYR	AQLQ1348↓AQSL	MYO5B	1532.66	>1300
AAVLLQAQVNYAYR	VLLQ513↓AQVN	NEB	1375.3	>1300
AAKMLHSLKVYAYR	KMLH622↓SLKV	NEB	240.82	>130
AAVLLQAQLNYAYR	VLLQ760↓AQLN	NEB	1358.15	>1300
AAKMLHSLKTYAYR	KMLH869↓SLKT	NEB	37.266	>13
AAHILHSYSYYAYR	HILH922↓SYSY	NEB	7.70164	<13
AAYALQSDVEYAYR	YALQ943↓SDVE	NEB	16.0451	>13
AAQFLQAKCNYAYR	QFLQ1283↓AKCN	NEB	524.547	>130
AAAKLQSDREYAYR	AKLQ1365↓SDRE	NEB	1486.74	>1300
AAYDLQSDNMYAYR	YDLQ2893↓SDNM	NEB	1.79108	<13
AASILHSKNSYAYR	SILH4068↓SKNS	NEB	1502.99	>1300
AAYELQSDNVYAYR	YELQ4107↓SDNV	NEB	0	<1
AAYDLQSDNVYAYR	YDLQ4349↓SDNV	NEB	0	<1
AAQILHAKKSYAYR	QILH4621↓AKKS	NEB	17.1912	>13
AAYDLQSQLQYAYR	YDLQ4629↓SQLQ	NEB	42.7869	>13
AAEILHAKHAYAYR	EILH4866↓AKHA	NEB	15.2006	>13
AARALHAYKLYAYR	RALH4940↓AYKL	NEB	28.1767	>13
AAYKLQSSNLYAYR	YKLQ4945↓SSNL	NEB	1277.01	>130
AAQKLQSQYLYAYR	QKLQ5191↓SQYL	NEB	1065.88	>130
AADFLQAAKSYAYR	DFLQ5569↓AAKS	NEB	46.2098	>13
AATELQSIVKYAYR	TELQ5897↓SIVK	NEB	1537.43	>1300
AAQALQGEREYAYR	QALQ161↓GERE	NEFL	8.55737	<13
AARNLQARYEYAYR	RNLQ175↓ARYE	NEFL	13.9186	>13
AAAELQAQIQYAYR	AELQ235↓AQIQ	NEFL	841.9	>130
AALVLQALLYAYR	LVLQ624↓ALL	NSF	10.6967	>13
AAEILQGKLSYAYR	EILQ384↓GKLS	NUMA1	18.4839	>13
AATQLQARVEYAYR	TQLQ433↓ARVE	NUMA1	1448.21	>1300
AATDLQSSISYAYR	TDLQ472↓SSIS	NUMA1	1368.6	>1300
AAAELHANLAYAYR	AELH878↓ANLA	NUMA1	49.78	>13
AAAALQAMERYAYR	AALQ968↓AMER	NUMA1	52.04	>13
AAPGLQSPAKYAYR	PGLQ428↓SPAK	PCLO	10.6967	<13
AAPTLHGSPSYAYR	PTLH713↓GSPS	PCLO	33.9778	>13
AASSLHASSYAYR	SSLH1721↓ASS	PCLO	922.827	>130
AAESLHSVVPYAYR	ESLH2021↓SVVP	PCLO	16.5035	>13
AAEELQSMKQYAYR	EELQ3261↓SMKQ	PCLO	10.7465	<13
AAAYLQGVAEYAYR	AYLQ3825↓GVAE	PCLO	58.6236	>13
AAAPLQSSSRYAYR	APLQ4099↓SSSR	PCLO	11.8487	<13
AASRLHSYVKYAYR	SRLH4105↓SYVK	PCLO	1443.39	>1300
AAHILQARNLYAYR	HILQ4715↓ARNL	PCLO	797.75	>130
AAGGLQSTPGYAYR	GGLQ449↓STPG	PHLPP1	44.4325	>13
AAVQLHGETTYAYR	VQLH476↓GETT	PHLPP1	50.23	>13
AANFLQSLPAYAYR	NFLQ750↓SLPA	PHLPP1	22.65	>13
AALRLQALRKYAYR	LRLQ801↓ALRK	PHLPP1	1526.45	>1300
AANRLQSFPAYAYR	NRLQ1050↓SFPA	PHLPP1	823.07	>130
AAKPLQGPPAYAYR	KPLQ7↓GPPA	PIM2	39.836	>13
AAALLQSDVRYAYR	ALLQ557↓SDVR	PLEC	1519	>1300
AAVTLQSVQRYAYR	VTLQ646↓SVQR	PLEC	1480.81	>1300
AAESLHSFVAYAYR	ESLH756↓SFVA	PLEC	62.45	>13
AAQALHSLELYAYR	QALH1064↓SLEL	PLEC	3.25	<13
AAQLLQSLEQYAYR	QLLQ1107↓SLEQ	PLEC	39.836	>13
AAGELQALRAYAYR	GELQ1613↓ALRA	PLEC	58.27	>13
AARALQALEEYAYR	RALQ1673↓ALEE	PLEC	24.84	>13
AALRLQAEEAYAYR	LRLQ1681↓AEEA	PLEC	183.47	>130
AAAELQSKRAYAYR	AELQ1716↓SKRA	PLEC	1519	>1300
AALRLQAEEVYAYR	LRLQ1784↓AEEV	PLEC	1032.2	>130
AAKRLQAEEKYAYR	KRLQ2185↓AEEK	PLEC	20.82	>13
AAHYLQGRSSYAYR	HYLQ2830↓GRSS	PLEC	683.09	>130
AASELQARETYAYR	SELQ3366↓ARET	PLEC	1455.87	>1300
AATLLQGSGCYAYR	TLLQ3489↓GSGC	PLEC	1342.54	>1300
AAHYLQSRVPYAYR	HYLQ79↓SRVP	PTPN23	1016.61	>130
AAGALHSMLGYAYR	GALH125↓SMLG	PTPN23	37.266	>13
AANFLQAHNGYAYR	NFLQ1607↓AHNG	PTPN23	871.532	>130
AAEKLQSFDSYAYR	EKLQ1021↓SFDS	RBM6	25.114	>13
AAPSLHAAAQYAYR	PSLH245↓AAAQ	SIPA1L2	42.01	>13
AAAVLQAEVQYAYR	AVLQ1683↓AEVQ	SIPA1L2	1299.09	>130
AASHLQSYSLYAYR	SHLQ315↓SYSL	STAM	1545.02	>1300
AAQMLQSTDPYAYR	QMLQ426↓STDP	STAM	30.8065	>13
AAPQLQSLSSYAYR	PQLQ146↓SLSS	SYNE1	1383.98	>1300
AAASLQAWLEYAYR	ASLQ626↓AWLE	SYNE1	1443.68	>1300
AAKDLQGEAPYAYR	KDLQ1012↓GEAP	SYNE1	6.79556	<13
AANFLQSVVAYAYR	NFLQ1761↓SVVA	SYNE1	1114.2	>130
AAQSLQGHLAYAYR	QSLQ1824↓GHLA	SYNE1	35.546	>13
AAHLLQGKAEYAYR	HLLQ1843↓GKAE	SYNE1	90.82	>13
AAEFLQSHASYAYR	EFLQ1875↓SHAS	SYNE1	15.9344	>13
AAEELHSKVNYAYR	EELH2255↓SKVN	SYNE1	9.46922	<13
AAKELQSQQSYAYR	KELQ2350↓SQQS	SYNE1	2.68662	<13
AADSLQSISTYAYR	DSLQ5973↓SIST	SYNE1	7.00149	<13
AANELQSSLAYAYR	NELQ6021↓SSLA	SYNE1	117.955	>13
AALALQSTLTYAYR	LALQ6044↓STLT	SYNE1	1480.04	>1300
AAHWLQSAKDYAYR	HWLQ6812↓SAKD	SYNE1	105.161	>13
AAQILQGLVTYAYR	QILQ7007↓GLVT	SYNE1	790.933	>130
AAEQLQAECEYAYR	EQLQ251↓AECE	TBKBP1	108.85	>13
AAERLQGELYAYR	ERLQ258↓GELK	TBKBP1	9.46922	<13
AASSLQGRILYAYR	SSLQ315↓GRIL	TBKBP1	1233.42	>130
AAGQLHALTEYAYR	GQLH126↓ALTE	TESK1	49.1594	>13
AARYLHSKGVYAYR	RYLH167↓SKGV	TESK1	24.84	>13
AAQFLQADLAYAYR	QFLQ78↓ADLA	TRIM25	44.4325	>13
AAPCLHSACSYAYR	PCLH85↓SACS	TRIM28	35.11	>13
AATGLQGFLVYAYR	TGLQ133↓GFLV	TUBA1B	1030.64	>130
AAVHLQAGQCYAYR	VHLQ8↓AGQC	TUBB4B	1525.97	>1300
AADCLQGFQLYAYR	DCLQ131↓GFQL	TUBB4B	905.502	>130
AASVLQAGNQYAYR	SVLQ371↓AGNQ	UTRN	1537.01	>1300
AAKSLQSDLEYAYR	KSLQ467↓SDLE	UTRN	7.85881	<13
AARDLQGAMDYAYR	RDLQ2697↓GAMD	UTRN	0	<1
AANTLQSFRQYAYR	NTLQ204↓SFRQ	VIM	1382.66	>1300
AAQELQAQIQYAYR	QELQ246↓AQIQ	VIM	6.19	<13
Peptides from other proteins
AARALQSPALYAYR	RALQ329↓SPAL	IQGAP1	0	<1
AAAALHAAVIYAYR	AALH218↓AAVI	IQGAP1	1304.73	>1300
